# Supplementary material
Source: PubMed Central journal article supplement (PMC4889449)
Supplement: NIHMS789084-supplement-Supp__Table_1.pdf [file NIHMS789084-supplement-Supp__Table_1.pdf]

**Supplementary Table 1. Discrete Traits.** Significant ( $P < 0.05$ ) Association of SNPs with T2DM<sup>1</sup>, Obesity<sup>2</sup>, MS<sup>3</sup> (NCEP-ATPIII) and with Individual MS Components. Association analyses were performed using Additive (Measured Genotype), Recessive and Dominant Genetic Models. SNPs with non standard refSNP numbers are not currently in the RefSNP database.

| Trait     | SNP       | MAF (%) | location (bp) | Additive | Dominant | Recessive |
|-----------|-----------|---------|---------------|----------|----------|-----------|
| T2DM      | rs2021966 | 49.8    | 21,107        | 0.041    |          |           |
| T2DM      | rs1931009 | 4.4     | 85,336        | 0.044    | 0.028    |           |
| BMI       | rs943004  | 3.7     | 11,544        | 0.0060   | 0.014    |           |
| BMI       | v24       | 18.5    | 29,772        |          |          | 0.0030    |
| BMI       | rs858341  | 35.3    | 31,123        |          |          | 0.047     |
| BMI       | rs858343  | 13.5    | 33,115        |          |          | 0.037     |
| BMI       | rs858345  | 42.7    | 34,285        |          |          | 0.030     |
| BMI       | rs6569761 | 17.1    | 38,195        |          |          | 0.031     |
| BMI       | rs997509  | 1.3     | 38,645        | 0.021    | 0.021    |           |
| BMI       | rs1044498 | 17.3    | 43,036        |          |          | 0.037     |
| BMI       | rs6569762 | 2.1     | 45,292        |          |          | 0.040     |
| BMI       | rs7769058 | 5.6     | 63,662        | 0.012    | 0.012    |           |
| BMI       | rs4371863 | 0.7     | 73,065        | 0.013    | 0.013    |           |
| BMI       | rs7768480 | 17.7    | 74,100        |          | 0.022    |           |
| MS        | rs858341  | 35.3    | 31,123        |          | 0.0468   |           |
| MS        | rs858344  | 36.7    | 33,662        |          | 0.0152   |           |
| MS        | v33.21    | 0.6     | 52,324        | 0.0074   | 0.0074   |           |
| MS        | rs7768480 | 17.7    | 74,100        | 0.0097   | 0.0026   |           |
| Waist     | rs4428518 | 44.4    | 3,054         | 0.029    | 0.0364   | 0.0364    |
| Waist     | rs6918013 | 7.9     | 9,386         |          |          | 0.0381    |
| Waist     | rs943004  | 3.7     | 11,544        | 0.0099   | 0.0072   |           |
| Waist     | rs1409183 | 13.3    | 14,549        |          |          | 0.0154    |
| Waist     | rs1409182 | 13.4    | 14,611        |          |          | 0.026     |
| Waist     | rs858334  | 12.8    | 22,644        |          |          | 0.0138    |
| Waist     | rs7768480 | 17.7    | 74,100        |          | 0.0092   |           |
| High TG   | rs6918013 | 7.9     | 9,386         |          |          | 0.0406    |
| High TG   | rs943004  | 3.7     | 11,544        |          |          | 0.001     |
| High TG   | rs2021966 | 49.3    | 21,107        |          |          | 0.035     |
| High TG   | rs9372999 | 10.4    | 23,820        |          | 0.0275   |           |
| High TG   | rs703184  | 9.3     | 25,663        |          |          | 0.0417    |
| High TG   | v24       | 18.5    | 29,772        |          | 0.0335   |           |
| High TG   | rs858342  | 18.6    | 31,311        |          | 0.042    | 0.011     |
| Low HDL-C | rs4086314 | 29.0    | 3,407         |          |          | 0.0169    |
| Low HDL-C | rs858337  | 13.9    | 23,591        |          |          | 0.0464    |
| Low HDL-C | rs9372999 | 10.4    | 23,820        | 0.021    | 0.023    |           |
| Low HDL-C | v33.21    | 0.6     | 52,324        |          | 0.0043   |           |
| HT        | rs766592  | 45.6    | 2,269         |          |          | 0.040     |
| HT        | rs6918013 | 7.9     | 9,386         | 0.027    | 0.0091   |           |

|     |           |      |        |        |        |        |
|-----|-----------|------|--------|--------|--------|--------|
| HT  | rs6939185 | 45.8 | 9,855  |        |        | 0.023  |
| HT  | rs1409182 | 13.4 | 14,611 | 0.029  |        |        |
| HT  | rs2021315 | 40.7 | 19,922 |        |        | 0.049  |
| HT  | rs7771242 | 17.3 | 21,714 |        |        | 0.040  |
| HT  | rs7771841 | 12.0 | 21,773 |        |        | 0.025  |
| HT  | rs858334  | 12.8 | 22,644 |        |        | 0.039  |
| HT  | rs858336  | 13.8 | 23,249 |        |        | 0.0068 |
| HT  | rs858338  | 49.5 | 23,875 | 0.0065 | 0.0065 |        |
| HT  | rs2022337 | 5.0  | 25,602 | 0.046  | 0.046  |        |
| HT  | rs703184  | 9.3  | 25,663 |        |        | 0.031  |
| HT  | rs2327173 | 11.2 | 26,038 | 0.023  |        | 0.047  |
| HT  | rs6916495 | 13.8 | 30,933 |        |        | 0.043  |
| HT  | rs4141767 | 13.2 | 35,675 | 0.034  | 0.011  |        |
| HT  | rs1044498 | 17.3 | 43,036 | 0.043  | 0.041  |        |
| HT  | rs6919751 | 16.3 | 43,604 | 0.0429 |        |        |
| HT  | rs6926728 | 16.3 | 45,097 | 0.045  |        |        |
| HT  | rs7767502 | 16.9 | 45,597 | 0.038  |        |        |
| HT  | rs7749493 | 14.7 | 45,727 | 0.031  |        |        |
| HT  | rs9493113 | 13.3 | 52,341 | 0.021  |        | 0.011  |
| HT  | rs1974201 | 38.6 | 81,789 | 0.047  |        |        |
| HT  | rs7754561 | 44.5 | 83,362 | 0.027  |        |        |
| HT  | rs7754859 | 43.8 | 83,476 | 0.047  |        |        |
| HFG | rs858344  | 36.7 | 33,662 |        | 0.031  |        |
| HFG | rs7768480 | 17.7 | 74,100 |        | 0.041  |        |
| HFG | rs1974201 | 38.6 | 81,789 |        |        | 0.023  |

<sup>1</sup> Type 2 diabetes Mellitus, by WHO criteria.

<sup>2</sup> Obesity, BMI  $\geq$  30 kg/m<sup>2</sup>.

<sup>3</sup> The Metabolic Syndrome, as defined by NCEP-ATPIII criteria (2001) requires the presence of at least three of the following five risk factors: (1) Increased waist circumference (Waist)  $\geq$  102 cm or 40 inches (male),  $\geq$  88 cm or 36 inches (female); (2) Hypertriglyceridemia (High TG)  $\geq$  1.695 mmol/L (150 mg/dl); (3) Low HDL-C:  $<$  40 mg/dL (male),  $<$  50 mg/dL (female); (3) Hypertension (HT)  $\geq$  130/85 mmHg; (4) High Fasting Plasma Glucose (HFG)  $\geq$  6.1 mmol/L (110 mg/dl).
