# Supplementary material
Source: PubMed Central journal article supplement (PMC4889449)
Supplement: NIHMS789084-supplement-Supp__Table_2.pdf [file NIHMS789084-supplement-Supp__Table_2.pdf]

**Supplementary Table 2. Quantitative Traits.** Significant ( $P < 0.05$ ) Association of SNPs with Key MS-Related Traits. Association analyses were performed using Recessive and Dominant Genetic Models. SNPs with non standard refSNP numbers are not currently in the RefSNP database.

| Trait    | SNP       | MAF (%) | location (bp) | Dominant | Recessive |
|----------|-----------|---------|---------------|----------|-----------|
| FPG      | rs2021966 | 49.3    | 21,107        |          | 0.019     |
| FPG      | rs2022337 | 5.0     | 25,602        |          | 0.030     |
| FPG      | rs858344  | 36.7    | 33,662        | 0.023    |           |
| FPG      | rs7769058 | 5.6     | 63,662        | 0.016    |           |
| FPG      | rs6928362 | 2.4     | 81,349        | 0.029    |           |
| FPG      | rs1931009 | 4.4     | 85,336        | 0.030    |           |
| BMI      | rs943004  | 3.7     | 11,544        | 0.0090   |           |
| BMI      | rs997509  | 1.3     | 38,645        | 0.014    |           |
| BMI      | rs7769058 | 5.6     | 63,662        | 0.039    |           |
| lnLeptin | rs1581827 | 2.4     | 23,736        | 0.018    |           |
| lnLeptin | rs4371863 | 0.7     | 73,065        | 0.020    |           |
| lnLeptin | rs1409183 | 13.3    | 14,549        | 0.030    |           |
| HDL-C    | rs1830971 | 29.0    | 19021         |          | 0.027     |
| HDL-C    | rs858334  | 12.8    | 22,644        |          | 0.025     |
| HDL-C    | rs1581827 | 2.4     | 23,736        | 0.019    |           |
| HDL-C    | rs9372999 | 10.4    | 23,820        | 0.011    |           |
| HDL-C    | rs858337  | 13.9    | 23,591        |          | 0.00060   |
| HDL-C    | rs1800949 | 29.1    | -768          |          | 0.036     |
| HDL-C    | v33.21    | 0.6     | 52,324        | 0.015    |           |
| HDL-C    | rs7767111 | 7.8     | 78,953        |          | 0.0045    |
| HDL-C    | rs6905840 | 7.3     | 81,533        | 0.049    |           |
| HDL-C    | rs1804025 | 4.9     | 82,202        |          | 0.0048    |
| HDL-C    | rs1044548 | 7.2     | 82,431        |          | 0.0048    |
| HDL-C    | rs1044558 | 7.4     | 82,482        |          | 0.0048    |
| HDL-C    | rs876507  | 1.1     | 2,330         | 0.023    |           |
| HDL-C    | rs943004  | 3.7     | 11,544        | 0.0047   |           |
| HDL-C    | rs943003  | 47.9    | 11,680        |          | 0.042     |
| HDL-C    | rs1409183 | 13.3    | 14,549        |          | 0.0010    |
| FSI      | rs7755415 | 1.0     | 18,653        | 0.043    |           |
| FSI      | rs943004  | 3.7     | 11,544        | 0.015    |           |
| SS       | rs997509  | 1.3     | 38,645        | 0.020    |           |
| SS       | rs6928362 | 2.4     | 81,349        | 0.015    |           |
| SS       | rs6929388 | 1.0     | 18,653        | 0.025    |           |
| lnTG     | rs9372999 | 10.4    | 23,820        | 0.017    |           |
| lnTG     | v24       | 18.5    | 29,772        | 0.032    |           |
| lnTG     | rs858342  | 18.6    | 31,311        | 0.036    |           |
| lnTG     | rs858343  | 13.5    | 33,115        | 0.025    |           |
| lnTG     | rs943004  | 3.7     | 11,544        | 0.00040  |           |
